# Supplementary material for: Kinetics and mechanism of the reaction of perfluoro propyl vinyl ether (PPVE, C3F7OCHCH2) with OH: assessment of its fate in the atmosphere
Source: Royal Society of Chemistry journal article supplement (doi:10.1039/c5cp02233a), 2015-01-01
Supplement: c5cp02233a1.pdf [file c5cp02233a1.pdf]

**Supporting Information:** Kinetics and mechanism of the reaction of perfluoro propyl vinyl ether (PPVE, C<sub>3</sub>F<sub>7</sub>OCF=CF<sub>2</sub>) with OH: Assessment of its fate in the atmosphere

D. Amedro, L. Vereecken and J. N. Crowley

**Table SI 1.** Results of the UV absorption cross section of PPVE

| $\lambda$ (nm) | $\sigma$ (10 <sup>-20</sup> cm <sup>2</sup> molecule <sup>-1</sup> ) | $\lambda$ (nm) | $\sigma$ (10 <sup>-20</sup> cm <sup>2</sup> molecule <sup>-1</sup> ) |
|----------------|----------------------------------------------------------------------|----------------|----------------------------------------------------------------------|
| 195.0          | 32.27                                                                | 205.2          | 0.80                                                                 |
| 195.2          | 31.03                                                                | 205.4          | 0.75                                                                 |
| 195.4          | 29.58                                                                | 205.6          | 0.67                                                                 |
| 195.6          | 28.34                                                                | 205.8          | 0.60                                                                 |
| 195.8          | 26.42                                                                | 206.0          | 0.56                                                                 |
| 196.0          | 25.32                                                                | 206.2          | 0.52                                                                 |
| 196.2          | 24.11                                                                | 206.4          | 0.48                                                                 |
| 196.4          | 23.04                                                                | 206.6          | 0.44                                                                 |
| 196.6          | 21.38                                                                | 206.8          | 0.39                                                                 |
| 196.8          | 20.23                                                                | 207.0          | 0.38                                                                 |
| 197.0          | 18.79                                                                | 207.2          | 0.34                                                                 |
| 197.2          | 17.97                                                                | 207.4          | 0.31                                                                 |
| 197.4          | 16.32                                                                | 207.6          | 0.28                                                                 |
| 197.6          | 15.19                                                                | 207.8          | 0.27                                                                 |
| 197.8          | 14.26                                                                | 208.0          | 0.24                                                                 |
| 198.0          | 13.70                                                                | 208.2          | 0.22                                                                 |
| 198.2          | 12.85                                                                | 208.4          | 0.20                                                                 |
| 198.4          | 11.85                                                                | 208.6          | 0.18                                                                 |
| 198.6          | 10.62                                                                | 208.8          | 0.17                                                                 |
| 198.8          | 10.23                                                                | 209.0          | 0.17                                                                 |
| 199.0          | 9.54                                                                 | 209.2          | 0.15                                                                 |
| 199.2          | 9.02                                                                 | 209.4          | 0.14                                                                 |
| 199.4          | 8.28                                                                 | 209.6          | 0.12                                                                 |
| 199.6          | 7.49                                                                 | 209.8          | 0.12                                                                 |
| 199.8          | 7.10                                                                 | 210.0          | 0.10                                                                 |
| 200.0          | 6.64                                                                 | 210.2          | 0.10                                                                 |
| 200.2          | 6.01                                                                 | 210.4          | 0.08                                                                 |
| 200.4          | 5.44                                                                 | 210.6          | 0.08                                                                 |
| 200.6          | 5.11                                                                 | 210.8          | 0.08                                                                 |
| 200.8          | 4.75                                                                 | 211.0          | 0.07                                                                 |
| 201.0          | 4.51                                                                 | 211.2          | 0.06                                                                 |
| 201.2          | 4.16                                                                 | 211.4          | 0.05                                                                 |
| 201.4          | 3.81                                                                 | 211.6          | 0.06                                                                 |
| 201.6          | 3.47                                                                 | 211.8          | 0.06                                                                 |
| 201.8          | 3.23                                                                 | 212.0          | 0.05                                                                 |
| 202.0          | 3.06                                                                 | 212.2          | 0.05                                                                 |
| 202.2          | 2.79                                                                 | 212.4          | 0.04                                                                 |
| 202.4          | 2.48                                                                 | 212.6          | 0.04                                                                 |
| 202.6          | 2.37                                                                 | 212.8          | 0.04                                                                 |
| 202.8          | 2.21                                                                 | 213.0          | 0.04                                                                 |
| 203.0          | 2.04                                                                 | 213.2          | 0.03                                                                 |
| 203.2          | 1.87                                                                 | 213.4          | 0.03                                                                 |
| 203.4          | 1.70                                                                 | 213.6          | 0.04                                                                 |
| 203.6          | 1.60                                                                 | 213.8          | 0.03                                                                 |
| 203.8          | 1.50                                                                 | 214.0          | 0.03                                                                 |
| 204.0          | 1.36                                                                 | 214.2          | 0.03                                                                 |
| 204.2          | 1.21                                                                 | 214.4          | 0.03                                                                 |
| 204.4          | 1.12                                                                 | 214.6          | 0.02                                                                 |
| 204.6          | 1.07                                                                 | 214.8          | 0.02                                                                 |
| 204.8          | 1.00                                                                 | 215.0          | 0.02                                                                 |
| 205.0          | 0.90                                                                 |                |                                                                      |

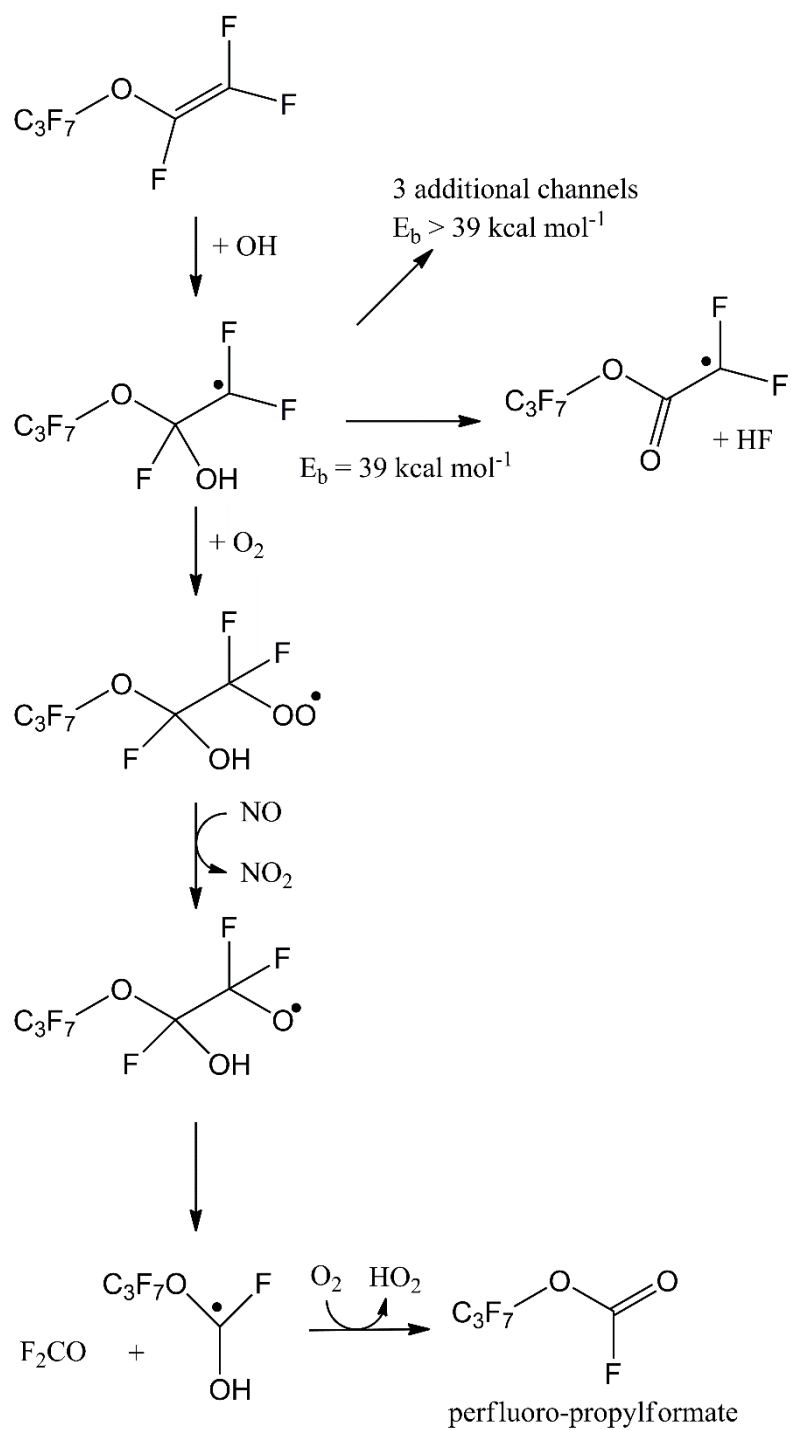

**Figure SI 1.** OH-initiated oxidation pathways for  $\text{C}_3\text{F}_7\text{OCF}=\text{CF}_2$ , at the M06-2X/aug-cc-pVTZ level of theory, following OH-addition on the inner carbon atom. The 3 additional pathways for the adduct can be found in figure SI 2.

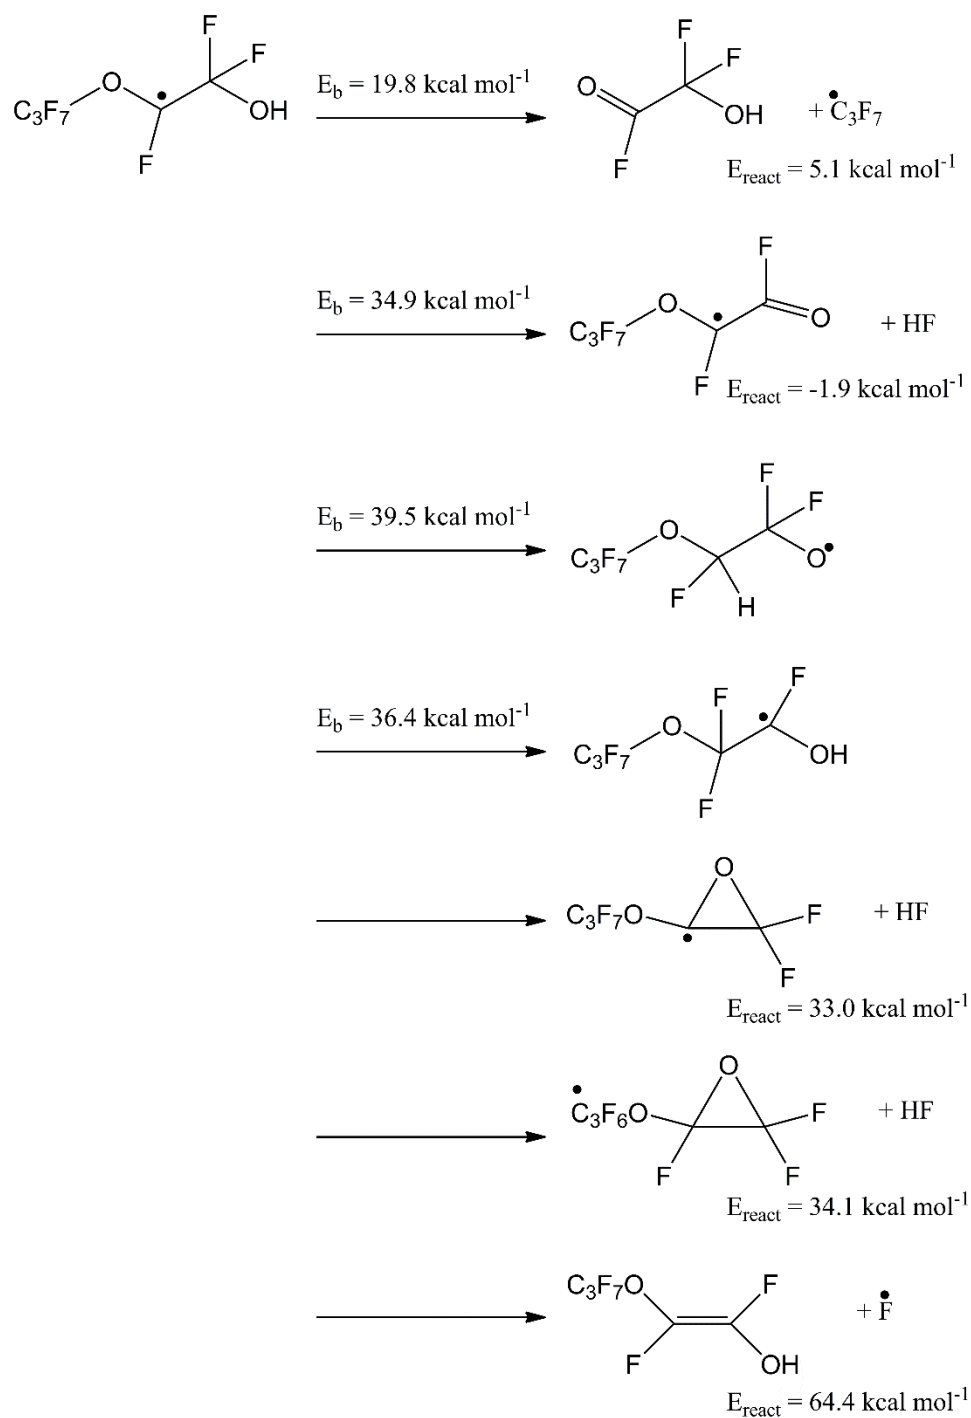

**Figure SI 2.** Unimolecular pathways for the most stable adduct formed in the OH + C<sub>3</sub>F<sub>7</sub>OCF=CF<sub>2</sub> reaction. Energies and barrier heights obtained at the M06-2X/aug-cc-pVTZ level of theory.

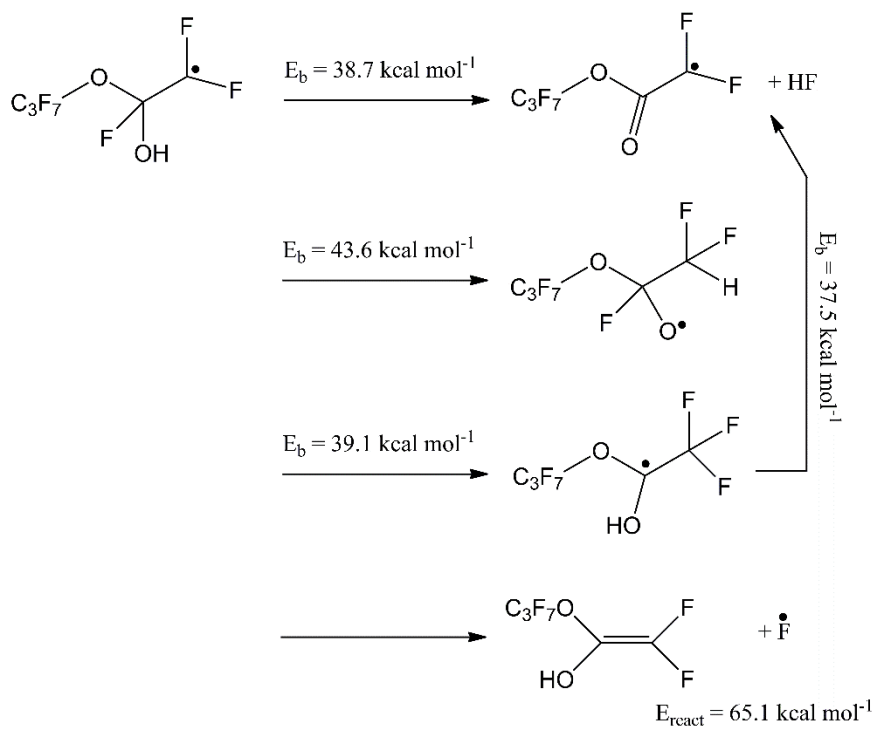

**Figure SI 3.** Unimolecular pathways for the least stable adduct formed in the OH + C<sub>3</sub>F<sub>7</sub>OCF=CF<sub>2</sub> reaction; this isomer is predicted to be 1.4 kcal mol<sup>-1</sup> above the more stable adduct. Energies and barrier heights obtained at the M06-2X/aug-cc-pVTZ level of theory.



## Selected quantum chemical properties for reactants, intermediates, products, and TS studied in this work.

\*\*\*\*\*  
 C3F7OCF=CF2 + OH : M06-2X/aug-cc-pVTZ geometry  
 \*\*\*\*\*

C3F7OCFCF2

-----  
 E (RM062X/Aug-CC-pVTZ) (Hartree): -1264.25066580

Electronic state : 1-A

Cartesian coordinates (Angs):

|   |           |           |           |
|---|-----------|-----------|-----------|
| C | -3.102207 | -0.447351 | 0.044024  |
| C | -2.235625 | 0.528537  | 0.231765  |
| O | -0.989898 | 0.329002  | 0.732043  |
| F | -2.554887 | 1.792393  | 0.013339  |
| F | -2.833293 | -1.707633 | 0.263575  |
| F | -4.326272 | -0.254150 | -0.371851 |
| C | 0.008786  | 0.155677  | -0.193376 |
| C | 1.339408  | 0.089068  | 0.587974  |
| C | 2.591378  | -0.181471 | -0.279211 |
| F | -0.174479 | -0.972091 | -0.886798 |
| F | 0.036230  | 1.164082  | -1.068407 |
| F | 1.517425  | 1.257742  | 1.212268  |
| F | 1.251988  | -0.890569 | 1.493547  |
| F | 2.721408  | 0.747055  | -1.215919 |
| F | 2.514000  | -1.371703 | -0.855455 |
| F | 3.659963  | -0.153878 | 0.504210  |

Rotational constants (GHz): 1.1644300 0.2995400 0.2845100

Vibrational harmonic frequencies (cm-1):

|           |           |           |
|-----------|-----------|-----------|
| 15.6037   | 26.2446   | 60.9535   |
| 77.2590   | 96.8434   | 155.6351  |
| 176.4783  | 216.8574  | 225.2384  |
| 232.1689  | 239.9667  | 297.5304  |
| 327.3632  | 340.4896  | 383.7597  |
| 388.0563  | 444.1678  | 481.6395  |
| 538.1716  | 542.6142  | 564.8442  |
| 588.1473  | 603.7076  | 632.2368  |
| 645.4812  | 686.1023  | 763.4425  |
| 826.8864  | 849.8500  | 1032.3416 |
| 1191.4441 | 1210.3508 | 1216.0612 |
| 1232.6037 | 1268.7656 | 1292.0210 |
| 1300.1737 | 1344.5447 | 1391.0446 |
| 1401.7278 | 1421.6771 | 1935.3064 |

Zero-point correction (Hartree): 0.065306

OH

-----  
 E (UM062X/Aug-CC-pVTZ) (Hartree): -75.73381016

Point group : C<sub>v</sub>

Cartesian coordinates (Angs):

|   |          |          |           |
|---|----------|----------|-----------|
| O | 0.000000 | 0.000000 | 0.107984  |
| H | 0.000000 | 0.000000 | -0.863871 |

Rotational constants (GHz): 0.0000000 564.3727589 564.3727589

Vibrational harmonic frequencies (cm-1):

3770.5842 ( SG)

Zero-point correction (Hartree): 0.008590

C3F7OCFCF2OH

-----  
 E (UM062X/Aug-CC-pVTZ) (Hartree): -1340.07631630

Electronic state : 2-A

Cartesian coordinates (Angs):

|   |           |           |           |
|---|-----------|-----------|-----------|
| C | 2.918346  | -0.373133 | -0.089803 |
| C | 2.022747  | 0.811911  | -0.379275 |
| O | 0.740682  | 0.659701  | -0.766619 |
| F | 2.222952  | 1.823050  | 0.459350  |
| C | -0.170908 | 0.017063  | 0.046229  |
| F | 2.793569  | -1.262240 | -1.072073 |
| O | 4.222695  | -0.026229 | 0.005133  |
| F | 2.507203  | -0.977899 | 1.060823  |
| H | 4.340384  | 0.616229  | 0.714614  |
| C | -1.575639 | 0.426446  | -0.451780 |
| C | -2.746358 | -0.318041 | 0.232540  |
| F | -0.013376 | 0.376011  | 1.320538  |
| F | -0.029950 | -1.306213 | -0.033771 |
| F | -1.730776 | 1.735523  | -0.227533 |
| F | -1.652587 | 0.188502  | -1.764545 |
| F | -2.668815 | -0.195755 | 1.550680  |
| F | -2.734184 | -1.603105 | -0.085564 |
| F | -3.886984 | 0.214405  | -0.182370 |

Rotational constants (GHz): 1.0591700 0.2775000 0.2667300

Vibrational harmonic frequencies (cm-1):

|          |          |          |
|----------|----------|----------|
| 22.6482  | 33.6208  | 57.0005  |
| 70.1107  | 80.3144  | 113.7833 |
| 146.2515 | 193.2194 | 197.5303 |

|           |           |           |
|-----------|-----------|-----------|
| 224.1660  | 227.3574  | 237.6552  |
| 252.3670  | 298.2786  | 323.6596  |
| 342.1079  | 378.5191  | 384.9736  |
| 440.0225  | 475.2645  | 509.9351  |
| 539.5613  | 549.9889  | 559.9036  |
| 595.6286  | 616.1559  | 662.2152  |
| 669.7273  | 696.3220  | 770.8679  |
| 805.7168  | 840.9004  | 1010.3115 |
| 1073.3120 | 1114.3750 | 1180.0615 |
| 1197.2897 | 1239.6226 | 1251.8617 |
| 1269.7168 | 1283.6199 | 1300.3367 |
| 1308.0560 | 1377.4052 | 1383.9355 |
| 1416.6924 | 1442.0542 | 3850.6640 |

Zero-point correction (Hartree): 0.079770

C3F7OCFOHCF2

-----  
E(UM062X/Aug-CC-pVTZ) (Hartree): -1340.07439811

Electronic state : 2-A

Cartesian coordinates (Angs):

|   |           |           |           |
|---|-----------|-----------|-----------|
| C | 2.849975  | -0.718367 | -0.117458 |
| C | 2.263250  | 0.664302  | 0.081829  |
| O | 0.901960  | 0.816233  | -0.292445 |
| F | 2.354518  | 0.958962  | 1.399930  |
| C | -0.056655 | -0.051380 | 0.128702  |
| F | 2.783329  | -1.171974 | -1.346506 |
| F | 2.482900  | -1.620853 | 0.763516  |
| O | 2.972786  | 1.523649  | -0.676134 |
| H | 2.499174  | 2.362799  | -0.737088 |
| C | -1.418857 | 0.574701  | -0.254374 |
| C | -2.654374 | -0.307914 | 0.041593  |
| F | 0.069654  | -1.243902 | -0.473761 |
| F | -0.015800 | -0.263377 | 1.446707  |
| F | -1.416264 | 0.840475  | -1.565272 |
| F | -1.559743 | 1.717635  | 0.427389  |
| F | -2.701000 | -0.637236 | 1.324227  |
| F | -2.629678 | -1.411522 | -0.690025 |
| F | -3.745382 | 0.381803  | -0.263542 |

Rotational constants (GHz): 0.9311100 0.3063600 0.2919900

Vibrational harmonic frequencies (cm-1):

|           |           |           |
|-----------|-----------|-----------|
| 17.0637   | 41.7092   | 62.8512   |
| 81.0711   | 95.9043   | 123.8631  |
| 150.9156  | 194.2363  | 221.4734  |
| 226.7848  | 242.3990  | 250.8941  |
| 291.1059  | 300.2997  | 336.7432  |
| 350.7687  | 374.3428  | 385.0837  |
| 398.2916  | 461.2741  | 506.1970  |
| 531.4424  | 547.0798  | 570.6197  |
| 598.5494  | 613.5602  | 650.4812  |
| 686.2749  | 695.1250  | 766.9047  |
| 807.4114  | 861.4649  | 968.3982  |
| 1072.9160 | 1120.8654 | 1190.4655 |
| 1212.2118 | 1238.7941 | 1263.6854 |
| 1277.5990 | 1293.6167 | 1301.5094 |
| 1324.7091 | 1346.7708 | 1386.6016 |
| 1412.0187 | 1491.7016 | 3828.0051 |

Zero-point correction (Hartree): 0.080128

C3F7OCFCFO

-----  
E(UM062X/Aug-CC-pVTZ) (Hartree): -1239.62089461

Electronic state : 2-A

Cartesian coordinates (Angs):

|   |           |           |           |
|---|-----------|-----------|-----------|
| C | -3.260565 | -0.495727 | -0.032188 |
| C | -2.270677 | 0.517938  | 0.221143  |
| O | -1.042611 | 0.273787  | 0.696512  |
| F | -2.621022 | 1.770073  | 0.161582  |
| C | -0.003392 | 0.247410  | -0.214562 |
| F | 0.108866  | 1.423684  | -0.831601 |
| F | -0.222312 | -0.680956 | -1.144478 |
| C | 1.279090  | -0.073644 | 0.583404  |
| F | -2.740798 | -1.718824 | 0.112707  |
| O | -4.390031 | -0.304427 | -0.340726 |
| C | 2.573233  | -0.122213 | -0.262813 |
| F | 1.121380  | -1.264979 | 1.166304  |
| F | 1.435979  | 0.865798  | 1.520980  |
| F | 2.807407  | 1.055059  | -0.823172 |
| F | 2.475997  | -1.043311 | -1.209902 |
| F | 3.585058  | -0.428484 | 0.534671  |

Rotational constants (GHz): 1.1668700 0.3096200 0.2930300

Vibrational harmonic frequencies (cm-1):

|          |          |          |
|----------|----------|----------|
| 5.2814   | 22.9733  | 45.8238  |
| 62.7857  | 86.1587  | 117.1482 |
| 173.2589 | 185.9717 | 224.5231 |
| 229.7033 | 237.4305 | 296.7296 |
| 335.8130 | 338.8072 | 341.5481 |
| 383.9848 | 393.9296 | 479.4916 |
| 531.4612 | 544.0250 | 563.0303 |
| 586.8833 | 622.2073 | 649.5544 |

|           |           |           |
|-----------|-----------|-----------|
| 668.3888  | 684.5357  | 761.8180  |
| 817.4179  | 832.3817  | 1025.2784 |
| 1145.2893 | 1184.8043 | 1200.9258 |
| 1241.2633 | 1272.0242 | 1292.0254 |
| 1303.0936 | 1378.6245 | 1392.5851 |
| 1428.3020 | 1502.9335 | 1846.1755 |

Zero-point correction (Hartree): 0.064783

CFOCF2OH

E(RM062X/Aug-CC-pVTZ) (Hartree): -526.84003187

Electronic state : 1-A

Cartesian coordinates (Angs):

|   |           |           |           |
|---|-----------|-----------|-----------|
| C | 0.929047  | 0.134498  | -0.000171 |
| C | -0.607494 | 0.021071  | -0.000078 |
| F | 1.509983  | -1.046438 | -0.000278 |
| O | 1.519779  | 1.153804  | 0.000040  |
| F | -0.978647 | -0.691862 | 1.078483  |
| F | -0.979141 | -0.694302 | -1.076682 |
| O | -1.192509 | 1.226434  | -0.001584 |
| H | -0.517234 | 1.918099  | 0.000146  |

Rotational constants (GHz): 3.8203600 2.5446700 2.0827900

Vibrational harmonic frequencies (cm-1):

|           |           |           |
|-----------|-----------|-----------|
| 33.3716   | 210.5089  | 241.1353  |
| 305.5466  | 397.5701  | 441.0268  |
| 529.8981  | 613.8764  | 702.6013  |
| 787.4974  | 836.8157  | 1102.3224 |
| 1187.8995 | 1248.4435 | 1341.6037 |
| 1456.1852 | 1962.9970 | 3803.7008 |

Zero-point correction (Hartree): 0.039191

C3F7

E(UM062X/Aug-CC-pVTZ) (Hartree): -813.22558951

Electronic state : 2-A

Cartesian coordinates (Angs):

|   |           |           |           |
|---|-----------|-----------|-----------|
| C | -1.168781 | 0.197943  | -0.099725 |
| C | 0.190215  | -0.495567 | 0.123033  |
| C | 1.360270  | 0.328411  | -0.364566 |
| F | -1.301967 | 0.521398  | -1.381066 |
| F | -1.257164 | 1.298285  | 0.633779  |
| F | -2.147227 | -0.626100 | 0.241326  |
| F | 0.308258  | -0.762322 | 1.439395  |
| F | 0.183327  | -1.656139 | -0.544493 |
| F | 1.457493  | 1.520861  | 0.177651  |
| F | 2.502810  | -0.316508 | -0.339086 |

Rotational constants (GHz): 1.9976200 1.1348900 0.9928700

Vibrational harmonic frequencies (cm-1):

|           |           |           |
|-----------|-----------|-----------|
| 29.7152   | 74.8226   | 148.6521  |
| 216.1888  | 223.5978  | 268.4289  |
| 330.8045  | 354.0293  | 388.8335  |
| 461.9374  | 539.5340  | 582.3851  |
| 621.4316  | 648.6424  | 748.5743  |
| 812.4711  | 1051.1668 | 1168.4453 |
| 1238.0746 | 1277.8694 | 1284.2630 |
| 1348.2035 | 1409.9481 | 1417.1331 |

Zero-point correction (Hartree): 0.037920

C3F7OCFOCF2OH

E(UM062X/Aug-CC-pVTZ) (Hartree): -1415.29426113

Electronic state : 2-A

Cartesian coordinates (Angs):

|   |           |           |           |
|---|-----------|-----------|-----------|
| C | 2.750346  | -0.570370 | -0.140210 |
| C | 1.964699  | 0.794949  | 0.149515  |
| O | 0.642936  | 0.808562  | -0.308454 |
| F | 2.561806  | 1.737829  | -0.598686 |
| C | -0.305071 | -0.082543 | 0.102895  |
| F | -0.235694 | -0.348247 | 1.408596  |
| F | -0.201693 | -1.242332 | -0.556638 |
| C | -1.673788 | 0.566165  | -0.220621 |
| F | 2.530999  | -0.880632 | -1.408258 |
| O | 4.074571  | -0.444340 | 0.042688  |
| F | 2.217932  | -1.529308 | 0.636144  |
| H | 4.266685  | -0.134581 | 0.936165  |
| O | 2.123494  | 0.993811  | 1.451418  |
| C | -2.904000 | -0.331687 | 0.051560  |
| F | -1.798776 | 1.668246  | 0.527739  |
| F | -1.696897 | 0.903066  | -1.513641 |
| F | -2.918540 | -0.739338 | 1.312959  |
| F | -2.901545 | -1.388771 | -0.746050 |
| F | -4.000682 | 0.376292  | -0.182190 |

Rotational constants (GHz): 0.9388900 0.2598500 0.2487800

Vibrational harmonic frequencies (cm-1):

|          |          |          |
|----------|----------|----------|
| 15.1029  | 31.9507  | 54.1734  |
| 77.6590  | 84.1563  | 123.6738 |
| 152.4776 | 192.9443 | 208.7284 |
| 227.2179 | 229.6829 | 241.7742 |
| 257.3545 | 298.4176 | 311.4832 |



|           |           |           |
|-----------|-----------|-----------|
| 333.3640  | 346.6107  | 356.6467  |
| 381.5685  | 384.5612  | 441.2600  |
| 476.0917  | 518.4603  | 533.6256  |
| 548.7051  | 571.5892  | 594.6191  |
| 619.2219  | 647.3754  | 672.9100  |
| 698.8385  | 765.5391  | 779.5384  |
| 839.5522  | 887.6267  | 1029.5695 |
| 1088.2764 | 1141.5134 | 1189.1648 |
| 1192.6139 | 1223.7766 | 1242.7180 |
| 1263.9882 | 1268.1156 | 1299.8110 |
| 1300.5189 | 1321.1989 | 1381.6029 |
| 1408.5844 | 1416.6307 | 3841.4124 |

Zero-point correction (Hartree): 0.083185

C3F7OCFOCFO

E(UM062X/Aug-CC-pVTZ) (Hartree): -1314.82361732

Electronic state : 2-A

Cartesian coordinates (Angs):

|   |           |           |           |
|---|-----------|-----------|-----------|
| C | 2.723564  | 0.815766  | -0.231419 |
| C | 2.232197  | -0.599273 | 0.194970  |
| O | 0.913300  | -0.614548 | 0.663424  |
| F | 2.961579  | -0.955608 | 1.268479  |
| C | -0.095633 | -0.401329 | -0.232140 |
| F | -0.377963 | -1.503690 | -0.927665 |
| F | 0.234267  | 0.561655  | -1.108074 |
| C | -1.334474 | 0.039075  | 0.583677  |
| F | 2.305376  | 1.703796  | 0.654362  |
| O | 3.392307  | 1.066618  | -1.157904 |
| O | 2.407102  | -1.411657 | -0.859520 |
| C | -2.637015 | 0.175007  | -0.240280 |
| F | -1.063770 | 1.227140  | 1.132884  |
| F | -1.552029 | -0.859229 | 1.548207  |
| F | -3.039271 | -1.008030 | -0.677416 |
| F | -2.449491 | 0.981001  | -1.276350 |
| F | -3.577974 | 0.686434  | 0.539257  |

Rotational constants (GHz): 0.9688200 0.3053100 0.2979200

Vibrational harmonic frequencies (cm-1):

|           |           |           |
|-----------|-----------|-----------|
| 21.3625   | 41.6542   | 57.1180   |
| 61.3271   | 84.5708   | 100.8250  |
| 188.1077  | 196.2132  | 213.9200  |
| 229.8280  | 233.2284  | 244.0706  |
| 297.5392  | 335.0310  | 343.5287  |
| 353.7411  | 376.6552  | 384.6137  |
| 447.3309  | 487.0651  | 519.5773  |
| 549.9565  | 580.9858  | 595.2566  |
| 633.2924  | 669.3554  | 698.7990  |
| 753.9589  | 783.1786  | 810.0941  |
| 855.3655  | 998.9394  | 1082.9234 |
| 1148.1262 | 1187.9252 | 1196.4268 |
| 1230.0356 | 1250.3650 | 1270.8254 |
| 1287.2968 | 1299.4977 | 1306.7468 |
| 1387.5441 | 1413.4754 | 1978.4922 |

Zero-point correction (Hartree): 0.068769

complex.C3F7OCFCF2.OH.b

E(UM062X/Aug-CC-pVTZ) (Hartree): -1339.99146149

Electronic state : 2-A

Cartesian coordinates (Angs):

|   |           |           |           |
|---|-----------|-----------|-----------|
| C | 2.949426  | -0.141597 | 0.564582  |
| C | 2.040119  | -0.743658 | -0.185238 |
| O | 0.762745  | -0.952318 | 0.229339  |
| F | 2.344376  | -1.282362 | -1.348318 |
| C | -0.172629 | -0.034998 | -0.164521 |
| F | -0.138748 | 0.169316  | -1.480680 |
| F | 0.046569  | 1.152197  | 0.428703  |
| C | -1.552587 | -0.583271 | 0.262082  |
| F | 2.680241  | 0.385823  | 1.729238  |
| F | 4.204580  | -0.050006 | 0.236969  |
| H | 1.730262  | 2.269912  | -0.633936 |
| O | 2.526717  | 1.852337  | -1.003453 |
| C | -2.745537 | 0.360660  | -0.019323 |
| F | -1.525850 | -0.825415 | 1.576311  |
| F | -1.767812 | -1.725158 | -0.397874 |
| F | -2.808113 | 0.664290  | -1.307741 |
| F | -2.634082 | 1.478043  | 0.684468  |
| F | -3.863239 | -0.257046 | 0.332409  |

Rotational constants (GHz): 0.9689600 0.2677500 0.2655900

Vibrational harmonic frequencies (cm-1):

|          |          |          |
|----------|----------|----------|
| 7.5981   | 34.9268  | 47.2881  |
| 60.5152  | 74.2005  | 92.6895  |
| 110.4392 | 125.4216 | 160.4679 |
| 175.3234 | 191.6414 | 218.9911 |
| 226.1331 | 234.3025 | 242.7093 |
| 298.5752 | 327.5547 | 341.4762 |
| 381.3717 | 387.0624 | 390.1138 |
| 448.6005 | 481.8092 | 538.4065 |
| 542.9656 | 563.6575 | 586.3451 |

|           |           |           |
|-----------|-----------|-----------|
| 603.3637  | 624.1335  | 644.4313  |
| 685.3353  | 762.9734  | 828.2956  |
| 845.8461  | 1033.2475 | 1185.8255 |
| 1202.5509 | 1219.5346 | 1232.4612 |
| 1270.1162 | 1293.8103 | 1298.3866 |
| 1348.3462 | 1390.0806 | 1414.2651 |
| 1421.0250 | 1897.3474 | 3768.3200 |

Zero-point correction (Hartree): 0.075772

C3F6OCFCF2oxide

E(UM062X/Aug-CC-pVTZ) (Hartree): -1239.56573178

Electronic state : 2-A

Cartesian coordinates (Angs):

|   |           |           |           |
|---|-----------|-----------|-----------|
| C | -3.042411 | -0.510558 | -0.171230 |
| C | -2.042609 | 0.471923  | 0.188424  |
| O | -0.835570 | 0.107837  | 0.719288  |
| F | -2.378579 | 1.706602  | 0.528164  |
| C | 0.254025  | 0.353694  | -0.041853 |
| F | 0.361458  | 1.603015  | -0.467167 |
| C | 1.512563  | -0.226695 | 0.545878  |
| F | -2.847277 | -1.806178 | -0.042880 |
| O | -2.293617 | 0.129260  | -1.143426 |
| F | -4.330283 | -0.237915 | -0.154063 |
| C | 2.720025  | -0.132016 | -0.411102 |
| F | 1.301741  | -1.519575 | 0.822443  |
| F | 1.848723  | 0.403574  | 1.690763  |
| F | 3.062709  | 1.132490  | -0.610478 |
| F | 2.412571  | -0.686021 | -1.578188 |
| F | 3.749376  | -0.777644 | 0.115008  |

Rotational constants (GHz): 1.1621200 0.2786000 0.2640200

Vibrational harmonic frequencies (cm-1):

|           |           |           |
|-----------|-----------|-----------|
| 14.7945   | 23.6659   | 43.4229   |
| 63.6524   | 81.8983   | 151.8611  |
| 178.8888  | 200.9785  | 222.6329  |
| 225.5843  | 251.3281  | 297.8141  |
| 306.8526  | 355.9146  | 388.5834  |
| 459.3786  | 511.4441  | 522.4432  |
| 531.2790  | 548.2107  | 584.7481  |
| 589.8199  | 632.9620  | 653.8904  |
| 722.3901  | 765.4707  | 806.2464  |
| 821.2237  | 896.4627  | 1046.3072 |
| 1153.5401 | 1166.0911 | 1206.8097 |
| 1234.9445 | 1260.8355 | 1279.2158 |
| 1285.2141 | 1331.4271 | 1335.8804 |
| 1408.9022 | 1422.0860 | 1649.0031 |

Zero-point correction (Hartree): 0.065233

C3F7OCCF2oxide

E(UM062X/Aug-CC-pVTZ) (Hartree): -1239.56413237

Electronic state : 2-A

Cartesian coordinates (Angs):

|   |           |           |           |
|---|-----------|-----------|-----------|
| C | -3.444434 | 0.112732  | -0.053601 |
| C | -2.132129 | -0.436515 | -0.206413 |
| O | -0.977193 | 0.268792  | -0.291779 |
| C | 0.173662  | -0.446506 | -0.079493 |
| F | 0.357768  | -1.348101 | -1.048214 |
| C | 1.340049  | 0.567010  | -0.069228 |
| F | -3.671064 | 1.396143  | 0.150755  |
| O | -2.815479 | -0.554642 | 0.994282  |
| F | -4.523393 | -0.454581 | -0.552225 |
| F | 0.122233  | -1.103312 | 1.080886  |
| C | 2.747484  | -0.065863 | 0.039978  |
| F | 1.173000  | 1.385233  | 0.974279  |
| F | 1.298548  | 1.275980  | -1.201874 |
| F | 3.019117  | -0.791013 | -1.034458 |
| F | 2.831274  | -0.834946 | 1.116085  |
| F | 3.640693  | 0.908112  | 0.136156  |

Rotational constants (GHz): 1.3348500 0.2672100 0.2583800

Vibrational harmonic frequencies (cm-1):

|           |           |           |
|-----------|-----------|-----------|
| 14.5791   | 30.3433   | 36.4902   |
| 62.8185   | 92.1055   | 149.8196  |
| 204.2028  | 219.5295  | 226.0623  |
| 230.5867  | 274.7001  | 299.2569  |
| 340.7517  | 358.4546  | 383.5478  |
| 460.6431  | 499.6167  | 523.6661  |
| 532.8372  | 547.2583  | 564.2846  |
| 604.8328  | 639.0931  | 670.3345  |
| 696.8797  | 764.0175  | 802.2119  |
| 839.3663  | 928.2693  | 1032.9952 |
| 1166.2065 | 1186.0932 | 1202.9367 |
| 1227.1700 | 1240.7683 | 1269.7316 |
| 1297.8720 | 1301.8863 | 1310.6335 |
| 1390.1648 | 1418.6670 | 1627.5271 |

Zero-point correction (Hartree): 0.065313

F

E(UM062X/Aug-CC-pVTZ) (Hartree): -99.73232189  
 Point group : OH  
 Cartesian coordinates (Angs):  
 F 0.000000 0.000000 0.000000  
 Zero-point correction (Hartree): 0.000000

HF

-----  
 E(RM062X/Aug-CC-pVTZ) (Hartree): -100.45301335  
 Point group : C\*V  
 Electronic state : 1-SG  
 Cartesian coordinates (Angs):  
 F 0.000000 0.000000 0.091997  
 H 0.000000 0.000000 -0.827973  
 Rotational constants (GHz): 0.000000 623.9250717 623.9250717  
 Vibrational harmonic frequencies (cm-1):  
 4159.7924 ( SG)  
 Zero-point correction (Hartree): 0.009477

C3F7OCOHC2

-----  
 E(RM062X/Aug-CC-pVTZ) (Hartree): -1240.23795680  
 Electronic state : 1-A  
 Cartesian coordinates (Angs):  
 C -3.083041 -0.467600 0.038820  
 C -2.252185 0.542207 0.225719  
 O -0.993217 0.292667 0.749460  
 C -0.004650 0.145519 -0.166951  
 F -0.003356 1.172282 -1.045273  
 F -0.151483 -0.972723 -0.887522  
 C 1.341046 0.113042 0.590845  
 F -4.307576 -0.328007 -0.400141  
 F -2.792483 -1.716746 0.302625  
 O -2.615202 1.827647 0.073360  
 H -2.084984 2.247102 -0.614909  
 C 2.576264 -0.200748 -0.285848  
 F 1.273613 -0.820343 1.544777  
 F 1.530716 1.311504 1.154266  
 F 3.666287 -0.072919 0.457461  
 F 2.651555 0.643344 -1.306515  
 F 2.520254 -1.439074 -0.751140  
 Rotational constants (GHz): 1.1603800 0.3034300 0.2882300  
 Vibrational harmonic frequencies (cm-1):  
 16.1998 33.8154 62.6230  
 77.1697 101.3164 155.8828  
 180.1103 216.1329 226.9612  
 237.1513 247.7312 295.8240  
 299.4947 335.5073 340.7186  
 382.8654 390.8184 446.8589  
 486.5985 540.0467 545.2777  
 565.2707 589.1274 605.6997  
 638.6409 647.0719 686.6724  
 762.5537 825.8099 845.6603  
 1030.0157 1155.0230 1184.9829  
 1199.3465 1228.2606 1267.5134  
 1280.7704 1293.3589 1303.1104  
 1338.9938 1389.2378 1395.5585  
 1417.1671 1919.2491 3817.5526  
 Zero-point correction (Hartree): 0.077471

C3F7OCFCFOH

-----  
 E(RM062X/Aug-CC-pVTZ) (Hartree): -1240.23912999  
 Electronic state : 1-A  
 Cartesian coordinates (Angs):  
 C -3.122921 -0.458006 0.045771  
 C -2.228458 0.496444 0.241286  
 O -0.979686 0.314814 0.741284  
 F -2.566743 1.774474 0.024933  
 C 0.013985 0.140843 -0.186140  
 F 0.031407 1.142510 -1.071841  
 F -0.159631 -0.994092 -0.870569  
 C 1.350144 0.093269 0.586751  
 F -2.837905 -1.720521 0.263958  
 O -4.377312 -0.297865 -0.372570  
 H -4.559091 0.638114 -0.517122  
 C 2.600146 -0.172041 -0.284563  
 F 1.279564 -0.879350 1.501547  
 F 1.522414 1.268987 1.200695  
 F 2.718879 0.751294 -1.228285  
 F 2.532180 -1.366682 -0.852858  
 F 3.672912 -0.129594 0.493396  
 Rotational constants (GHz): 1.1659900 0.3032100 0.2879000  
 Vibrational harmonic frequencies (cm-1):  
 15.6277 27.9181 61.6967  
 75.4421 97.4427 150.7555  
 176.4478 215.1164 225.2439  
 232.4947 239.5975 297.7652  
 325.9159 329.3940 340.9049

|           |           |           |
|-----------|-----------|-----------|
| 383.4591  | 386.6714  | 428.4128  |
| 482.3873  | 538.8497  | 545.2317  |
| 569.1199  | 593.0685  | 604.2811  |
| 638.8680  | 649.4644  | 684.0203  |
| 762.0894  | 827.0340  | 845.9714  |
| 1031.8612 | 1140.4856 | 1192.9891 |
| 1213.3417 | 1226.3633 | 1266.8858 |
| 1271.6066 | 1289.4426 | 1299.4517 |
| 1324.7094 | 1391.3567 | 1419.9633 |
| 1453.5367 | 1908.7675 | 3849.0696 |

Zero-point correction (Hartree): 0.077527

C3F7OCOHC3

E(UM062X/Aug-CC-pVTZ) (Hartree): -1340.08823226

Electronic state : 2-A

Cartesian coordinates (Angs):

|   |           |           |           |
|---|-----------|-----------|-----------|
| C | 3.032950  | -0.431900 | -0.029588 |
| C | 1.970442  | 0.632316  | -0.057193 |
| O | 0.791751  | 0.232201  | 0.509332  |
| C | -0.312896 | 0.314047  | -0.289981 |
| F | -0.205103 | -0.498090 | -1.347942 |
| F | -0.485030 | 1.554920  | -0.755318 |
| C | -1.526724 | -0.100907 | 0.570806  |
| F | 4.153356  | 0.061610  | -0.579655 |
| F | 2.657735  | -1.505268 | -0.709374 |
| O | 2.325073  | 1.872924  | 0.297988  |
| H | 3.206236  | 2.074970  | -0.040960 |
| F | 3.340085  | -0.819404 | 1.212972  |
| C | -2.874872 | -0.157031 | -0.185376 |
| F | -1.654251 | 0.779333  | 1.569378  |
| F | -1.295651 | -1.316712 | 1.077369  |
| F | -3.832699 | -0.452208 | 0.682683  |
| F | -3.149168 | 1.013399  | -0.744007 |
| F | -2.848634 | -1.090371 | -1.124952 |

Rotational constants (GHz): 1.0545600 0.2540600 0.2473000

Vibrational harmonic frequencies (cm-1):

|           |           |           |
|-----------|-----------|-----------|
| 9.4935    | 28.2394   | 34.5601   |
| 45.7617   | 84.7651   | 94.2800   |
| 165.3933  | 188.2774  | 220.9204  |
| 231.2300  | 233.7744  | 245.9556  |
| 297.5661  | 320.0832  | 340.4827  |
| 372.2520  | 382.9360  | 393.5089  |
| 442.4926  | 467.1515  | 504.8872  |
| 543.7426  | 556.0485  | 568.2027  |
| 603.0720  | 614.2005  | 643.0544  |
| 684.5332  | 699.0448  | 764.7525  |
| 825.3325  | 864.1371  | 1012.0118 |
| 1118.3340 | 1185.4166 | 1195.3119 |
| 1218.1225 | 1224.9224 | 1235.5584 |
| 1266.0455 | 1273.7079 | 1294.7574 |
| 1301.6188 | 1377.6709 | 1395.8334 |
| 1421.6975 | 1466.8260 | 3833.2539 |

Zero-point correction (Hartree): 0.080399

TS.C3F7OCFCF2OH.C3F7+HOCF2CFO

E(UM062X/Aug-CC-pVTZ) (Hartree): -1340.04160831

Electronic state : 2-A

Cartesian coordinates (Angs):

|   |           |           |           |
|---|-----------|-----------|-----------|
| C | 3.066708  | -0.201586 | 0.145565  |
| C | 1.927995  | 0.623184  | -0.428935 |
| O | 1.014291  | 0.234425  | -1.147938 |
| F | 1.944978  | 1.871103  | 0.043632  |
| C | -0.410155 | -0.586379 | -0.306076 |
| F | 0.067261  | -0.861935 | 0.882775  |
| F | -0.614177 | -1.654551 | -1.023953 |
| C | -1.542938 | 0.420793  | -0.314885 |
| F | 3.006796  | -1.429271 | -0.357825 |
| O | 4.292500  | 0.309670  | -0.135349 |
| F | 2.897215  | -0.291628 | 1.490364  |
| H | 4.379942  | 1.181194  | 0.268297  |
| C | -2.845203 | -0.063197 | 0.364176  |
| F | -1.130630 | 1.519511  | 0.331801  |
| F | -1.831753 | 0.722673  | -1.584883 |
| F | -2.609106 | -0.357869 | 1.636445  |
| F | -3.299208 | -1.147256 | -0.251594 |
| F | -3.766121 | 0.885796  | 0.304229  |

Rotational constants (GHz): 1.0204300 0.2618200 0.2522100

Vibrational harmonic frequencies (cm-1):

|           |          |          |
|-----------|----------|----------|
| i637.7006 | 15.3815  | 25.9253  |
| 30.2346   | 56.8616  | 61.0620  |
| 94.5499   | 113.3189 | 160.5478 |
| 198.5264  | 207.9359 | 216.9138 |
| 229.3846  | 251.7007 | 268.2121 |
| 294.0742  | 347.0120 | 376.8656 |
| 387.5068  | 400.3001 | 448.4497 |
| 468.5426  | 515.0990 | 536.7430 |
| 545.4631  | 590.1878 | 617.0924 |

|           |           |           |
|-----------|-----------|-----------|
| 635.6812  | 685.2136  | 687.7473  |
| 703.0208  | 793.5411  | 823.1225  |
| 1042.3569 | 1102.6734 | 1114.6394 |
| 1203.5455 | 1226.8610 | 1263.7533 |
| 1280.4653 | 1281.7647 | 1328.9630 |
| 1372.2514 | 1376.8522 | 1391.2825 |
| 1421.4414 | 1567.6720 | 3850.9890 |

Zero-point correction (Hartree): 0.076573

TS.C3F7OCFOCF2OH.C3F7O+HOFCF2CFO

E(UM062X/Aug-CC-pVTZ) (Hartree): -1415.26721882

Electronic state : 2-A

Cartesian coordinates (Angs):

|   |           |           |           |
|---|-----------|-----------|-----------|
| C | -2.915408 | -0.641585 | -0.074455 |
| C | -2.290592 | 0.775847  | 0.044256  |
| O | -0.617992 | 0.323854  | 0.583806  |
| F | -2.707921 | 1.374490  | 1.142193  |
| C | 0.455118  | 0.476983  | -0.213978 |
| F | 0.738144  | 1.758338  | -0.463901 |
| F | 0.338738  | -0.152760 | -1.386969 |
| C | 1.646847  | -0.156094 | 0.588295  |
| F | -2.861443 | -1.252677 | 1.099857  |
| O | -4.217908 | -0.544357 | -0.441673 |
| F | -2.206932 | -1.341807 | -0.968917 |
| H | -4.274857 | -0.319013 | -1.378270 |
| O | -1.956305 | 1.424442  | -0.936017 |
| C | 2.976021  | -0.223250 | -0.208310 |
| F | 1.857867  | 0.577570  | 1.682561  |
| F | 1.325102  | -1.402934 | 0.940153  |
| F | 3.314704  | 0.971931  | -0.666025 |
| F | 2.874288  | -1.067113 | -1.222313 |
| F | 3.925294  | -0.654362 | 0.611639  |

Rotational constants (GHz): 0.9093400 0.2425000 0.2362900

Vibrational harmonic frequencies (cm-1):

|           |           |           |
|-----------|-----------|-----------|
| i587.4444 | 11.5437   | 27.4714   |
| 42.0515   | 50.3890   | 80.2417   |
| 89.2237   | 141.7015  | 186.3239  |
| 218.6902  | 223.1083  | 231.4429  |
| 236.2670  | 254.1206  | 260.6598  |
| 292.4921  | 308.3162  | 337.9692  |
| 356.4365  | 380.0014  | 382.7604  |
| 449.8106  | 471.1282  | 501.1426  |
| 546.1771  | 551.6532  | 572.8114  |
| 591.9935  | 611.8523  | 625.1807  |
| 681.1023  | 695.1792  | 750.4729  |
| 813.6767  | 826.6112  | 990.3196  |
| 1126.0945 | 1138.6978 | 1145.2827 |
| 1191.4071 | 1227.8326 | 1255.2469 |
| 1267.6833 | 1273.3097 | 1305.0086 |
| 1306.5892 | 1323.9079 | 1384.6481 |
| 1405.4677 | 1553.5975 | 3842.1881 |

Zero-point correction (Hartree): 0.080960

TS.C3F7OCFOHCF2.C3F7OCFCF2+OH

E(UM062X/Aug-CC-pVTZ) (Hartree): -1339.98913032

Electronic state : 2-A

Cartesian coordinates (Angs):

|   |           |           |           |
|---|-----------|-----------|-----------|
| C | 2.836375  | 0.650732  | -0.031783 |
| C | 2.043245  | -0.404333 | -0.268579 |
| O | 0.830469  | -0.548908 | 0.315851  |
| F | 2.352749  | -1.291222 | -1.178728 |
| C | -0.239912 | 0.006809  | -0.347563 |
| F | -0.325998 | -0.456730 | -1.594612 |
| F | -0.116324 | 1.335801  | -0.418956 |
| C | -1.504559 | -0.368957 | 0.456079  |
| F | 2.535157  | 1.588307  | 0.817631  |
| F | 3.990722  | 0.806893  | -0.595644 |
| O | 3.281101  | -1.213635 | 1.312063  |
| H | 2.723667  | -0.963153 | 2.065815  |
| C | -2.819636 | 0.245538  | -0.079058 |
| F | -1.343535 | 0.045993  | 1.717126  |
| F | -1.631941 | -1.698469 | 0.437169  |
| F | -3.012895 | -0.096230 | -1.344700 |
| F | -2.789937 | 1.566495  | 0.014709  |
| F | -3.825699 | -0.213644 | 0.650038  |

Rotational constants (GHz): 0.9933900 0.2641500 0.2595200

Vibrational harmonic frequencies (cm-1):

|           |          |          |
|-----------|----------|----------|
| i216.0272 | 10.0545  | 22.0677  |
| 56.3275   | 69.2458  | 92.6508  |
| 112.7143  | 135.6534 | 153.5310 |
| 177.8639  | 213.9673 | 223.8361 |
| 230.7282  | 239.9893 | 265.5619 |
| 297.9158  | 327.2046 | 340.3255 |
| 383.5592  | 387.8304 | 411.9593 |
| 480.4400  | 511.6316 | 541.0392 |
| 544.4416  | 574.8986 | 591.4815 |
| 606.1208  | 643.6673 | 681.2347 |

|           |           |           |
|-----------|-----------|-----------|
| 706.3489  | 762.8213  | 825.7523  |
| 840.2967  | 1030.7787 | 1191.9764 |
| 1202.5456 | 1222.8415 | 1236.5420 |
| 1270.4689 | 1293.5125 | 1301.4408 |
| 1367.3172 | 1389.6382 | 1424.6880 |
| 1437.9977 | 1801.3990 | 3782.7618 |

Zero-point correction (Hartree): 0.076130

TS.C3F7OCFCF2OH.C3F7OCF2CFOH

E(UM062X/Aug-CC-pVTZ) (Hartree): -1340.01682076

Electronic state : 2-A

Cartesian coordinates (Angs):

|   |           |           |           |
|---|-----------|-----------|-----------|
| C | -3.089686 | 0.457456  | -0.236504 |
| C | -2.034281 | -0.386859 | -0.499672 |
| O | -0.810076 | 0.050610  | -0.768032 |
| F | -2.249251 | -1.665616 | -0.636337 |
| C | 0.204509  | -0.084473 | 0.182515  |
| F | 0.157645  | -1.272144 | 0.766257  |
| F | 0.113650  | 0.866007  | 1.098574  |
| C | 1.526644  | 0.068793  | -0.605946 |
| F | -2.896336 | 1.735585  | -0.282000 |
| O | -4.322403 | 0.082664  | -0.051509 |
| F | -2.350147 | -0.283066 | 1.526642  |
| H | -4.317803 | -0.666345 | 0.568216  |
| C | 2.802582  | 0.071745  | 0.268420  |
| F | 1.492080  | 1.221495  | -1.282686 |
| F | 1.619631  | -0.948830 | -1.468877 |
| F | 2.863640  | -1.026371 | 1.007607  |
| F | 2.824656  | 1.131990  | 1.060698  |
| F | 3.859877  | 0.112081  | -0.530407 |

Rotational constants (GHz): 1.0604700 0.2683400 0.2645900

Vibrational harmonic frequencies (cm-1):

|           |           |           |
|-----------|-----------|-----------|
| i287.9297 | 18.4743   | 34.0051   |
| 55.5682   | 77.1814   | 89.2440   |
| 133.8410  | 145.4915  | 170.7673  |
| 212.5438  | 228.9552  | 241.1472  |
| 259.2525  | 293.8053  | 301.9975  |
| 310.6096  | 333.0210  | 343.3949  |
| 385.6506  | 393.4906  | 452.9948  |
| 479.5484  | 537.6951  | 540.7768  |
| 548.4169  | 574.3697  | 588.1060  |
| 617.2729  | 653.6692  | 684.9979  |
| 761.8479  | 822.4239  | 841.9195  |
| 1020.9888 | 1166.0681 | 1174.4846 |
| 1202.2605 | 1266.9935 | 1268.5386 |
| 1276.3309 | 1285.9032 | 1315.5461 |
| 1380.9703 | 1389.1755 | 1439.8472 |
| 1516.5754 | 1741.7152 | 3735.0584 |

Zero-point correction (Hartree): 0.078171

TS.C3F7OCFCF2OH.CF2OH+C3F7OCFO

E(UM062X/Aug-CC-pVTZ) (Hartree): -1415.29360842

Electronic state : 2-A

Cartesian coordinates (Angs):

|   |           |           |           |
|---|-----------|-----------|-----------|
| C | 2.796818  | -0.586977 | -0.158286 |
| C | 1.933817  | 0.840899  | 0.213899  |
| O | 0.638540  | 0.793065  | -0.310896 |
| F | 2.541863  | 1.769888  | -0.545852 |
| C | -0.315263 | -0.084848 | 0.114221  |
| F | -0.257035 | -0.330877 | 1.422547  |
| F | -0.207571 | -1.255750 | -0.527933 |
| C | -1.681327 | 0.558297  | -0.231907 |
| F | 2.580018  | -0.798536 | -1.438851 |
| O | 4.098223  | -0.416783 | 0.057648  |
| F | 2.255234  | -1.574150 | 0.551501  |
| H | 4.249023  | -0.145672 | 0.972950  |
| O | 2.124658  | 0.903893  | 1.466962  |
| C | -2.915300 | -0.330232 | 0.053189  |
| F | -1.808177 | 1.677186  | 0.490546  |
| F | -1.696198 | 0.865862  | -1.532495 |
| F | -2.941759 | -0.704843 | 1.324540  |
| F | -2.907822 | -1.408075 | -0.716446 |
| F | -4.008870 | 0.372788  | -0.208598 |

Rotational constants (GHz): 0.9392400 0.2575400 0.2467700

Vibrational harmonic frequencies (cm-1):

|           |          |           |
|-----------|----------|-----------|
| i320.0899 | 17.4220  | 32.6160   |
| 58.9685   | 78.6457  | 90.3269   |
| 127.4938  | 153.8605 | 195.6197  |
| 222.9457  | 226.2857 | 228.5729  |
| 243.9852  | 287.9423 | 299.6369  |
| 323.1769  | 343.6900 | 347.1939  |
| 365.4578  | 384.6599 | 392.3541  |
| 435.9346  | 469.6481 | 533.0047  |
| 548.9888  | 557.9298 | 569.7914  |
| 595.9548  | 618.1953 | 652.4500  |
| 693.2060  | 739.3986 | 765.9553  |
| 836.6957  | 881.8443 | 1006.5146 |

|           |           |           |
|-----------|-----------|-----------|
| 1068.6626 | 1152.2060 | 1176.3305 |
| 1191.2279 | 1224.9162 | 1245.4837 |
| 1267.7761 | 1298.4191 | 1300.9516 |
| 1313.3750 | 1373.7854 | 1389.0300 |
| 1412.1898 | 1442.2563 | 3822.5747 |

Zero-point correction (Hartree): 0.082027

TS.C3F7OCFOHCF2.C3F7OCFOCF2H

E(UM062X/Aug-CC-pVTZ) (Hartree): -1340.00257586

Electronic state : 2-A

Cartesian coordinates (Angs):

|   |           |           |           |
|---|-----------|-----------|-----------|
| C | 2.058337  | -0.379023 | 0.175332  |
| C | 3.270459  | 0.512859  | 0.062286  |
| F | 4.300136  | 0.041786  | -0.607862 |
| O | 0.884584  | 0.263000  | -0.185997 |
| F | 3.074509  | 1.790782  | -0.177525 |
| F | 2.163027  | -1.547502 | -0.478836 |
| O | 2.259250  | -0.524605 | 1.533077  |
| H | 3.317531  | 0.235874  | 1.355098  |
| C | -0.285127 | -0.442637 | -0.122934 |
| C | -1.427107 | 0.587426  | 0.040234  |
| F | -0.291583 | -1.294000 | 0.906920  |
| F | -0.480639 | -1.151105 | -1.239650 |
| C | -2.854209 | -0.004954 | -0.028956 |
| F | -1.320222 | 1.504072  | -0.927808 |
| F | -1.284053 | 1.180941  | 1.229880  |
| F | -3.724675 | 0.955373  | 0.250560  |
| F | -2.997008 | -0.984112 | 0.853448  |
| F | -3.110861 | -0.472352 | -1.241073 |

Rotational constants (GHz): 1.0604700 0.2656400 0.2519800

Vibrational harmonic frequencies (cm-1):

|            |           |           |
|------------|-----------|-----------|
| i2010.7944 | 18.6312   | 36.0507   |
| 50.2292    | 68.2639   | 84.0812   |
| 111.2346   | 146.8498  | 198.8027  |
| 221.6769   | 228.9841  | 239.1301  |
| 274.3464   | 298.3435  | 328.2019  |
| 341.3432   | 377.1462  | 384.7558  |
| 420.0767   | 458.3822  | 513.8601  |
| 539.2271   | 560.6607  | 571.2493  |
| 598.7020   | 631.6228  | 680.0097  |
| 686.2124   | 735.5210  | 774.7722  |
| 848.2894   | 852.4315  | 1035.0283 |
| 1082.5865  | 1141.1913 | 1173.8352 |
| 1184.5428  | 1206.6064 | 1232.2356 |
| 1257.5080  | 1267.7503 | 1300.5675 |
| 1301.8372  | 1331.9104 | 1385.4668 |
| 1415.2390  | 1479.1775 | 2022.9199 |

Zero-point correction (Hartree): 0.075402

TS.C3F7OCFCF2OH.C3F7OCFCF2+OH

E(UM062X/Aug-CC-pVTZ) (Hartree): -1339.98959329

Electronic state : 2-A

Cartesian coordinates (Angs):

|   |           |           |           |
|---|-----------|-----------|-----------|
| C | -2.861503 | -0.482991 | -0.302776 |
| C | -1.994903 | 0.519037  | -0.127658 |
| O | -0.805624 | 0.373006  | 0.490416  |
| F | -2.319355 | 1.756106  | -0.452709 |
| C | 0.276665  | 0.141534  | -0.326124 |
| F | 0.392835  | 1.099688  | -1.249159 |
| F | 0.146910  | -1.021817 | -0.968862 |
| C | 1.525396  | 0.115604  | 0.582519  |
| F | -2.581039 | -1.719223 | -0.034792 |
| O | -3.471376 | 0.034645  | 1.774731  |
| F | -4.007114 | -0.323006 | -0.899811 |
| H | -3.945828 | 0.871232  | 1.639452  |
| C | 2.854876  | -0.183983 | -0.149527 |
| F | 1.351178  | -0.824929 | 1.514792  |
| F | 1.640691  | 1.311222  | 1.168934  |
| F | 3.081026  | 0.716529  | -1.095397 |
| F | 2.826758  | -1.390150 | -0.696535 |
| F | 3.841294  | -0.136380 | 0.733624  |

Rotational constants (GHz): 1.0026300 0.2566800 0.2541100

Vibrational harmonic frequencies (cm-1):

|           |           |           |
|-----------|-----------|-----------|
| i277.8676 | 11.1167   | 25.6672   |
| 56.6045   | 61.3663   | 88.6998   |
| 94.8296   | 116.7176  | 164.8271  |
| 180.7593  | 195.0638  | 222.6095  |
| 228.2866  | 231.5068  | 248.2044  |
| 297.4339  | 327.8858  | 340.1747  |
| 383.7350  | 388.3339  | 413.6890  |
| 480.5385  | 511.8753  | 540.2520  |
| 542.8391  | 579.9381  | 599.6992  |
| 608.3302  | 634.3765  | 643.4735  |
| 684.9851  | 763.3343  | 827.0215  |
| 842.5046  | 1030.7485 | 1192.7396 |
| 1206.6130 | 1217.0963 | 1234.8670 |
| 1271.7000 | 1293.1361 | 1300.4713 |

1355.8108 1390.6488 1422.5233  
1431.2545 1801.4602 3772.5903  
Zero-point correction (Hartree): 0.075768

TS.C3F7OCFOCF2OH.F+HOCF2COOC3F7

E(UM062X/Aug-CC-pVTZ) (Hartree): -1415.25049917

Electronic state : 2-A

Cartesian coordinates (Angs):

|   |           |           |           |
|---|-----------|-----------|-----------|
| C | 3.065475  | -0.556519 | 0.041190  |
| C | 1.857995  | 0.391680  | 0.225011  |
| O | 0.706622  | -0.230347 | -0.026378 |
| F | 2.161568  | 1.483100  | -1.264988 |
| C | -0.492284 | 0.416989  | 0.255110  |
| F | -0.572364 | 1.573832  | -0.386890 |
| F | -0.604237 | 0.635264  | 1.561661  |
| C | -1.609768 | -0.539967 | -0.222553 |
| F | 2.964953  | -1.218102 | -1.111240 |
| O | 4.233976  | 0.091034  | 0.112569  |
| F | 2.951811  | -1.475447 | 1.029182  |
| H | 4.101772  | 0.986107  | 0.452220  |
| O | 1.967930  | 1.460948  | 0.822562  |
| C | -3.048360 | -0.019238 | 0.007434  |
| F | -1.451120 | -0.748009 | -1.532345 |
| F | -1.480467 | -1.696642 | 0.433765  |
| F | -3.242753 | 1.117244  | -0.644573 |
| F | -3.272725 | 0.175931  | 1.298463  |
| F | -3.900036 | -0.926822 | -0.445191 |

Rotational constants (GHz): 0.9231200 0.2395600 0.2296600

Vibrational harmonic frequencies (cm-1):

|           |           |           |
|-----------|-----------|-----------|
| i587.3251 | 11.1458   | 38.3318   |
| 52.7529   | 64.9157   | 74.6890   |
| 96.3398   | 139.5269  | 149.5063  |
| 201.9668  | 211.1327  | 226.9523  |
| 232.2404  | 237.9895  | 246.9814  |
| 298.6187  | 321.1272  | 338.5278  |
| 356.8095  | 361.4421  | 386.7549  |
| 442.7261  | 465.0774  | 516.3872  |
| 542.7545  | 554.0440  | 576.3051  |
| 610.1504  | 624.1778  | 651.3442  |
| 681.8742  | 692.5153  | 771.2125  |
| 823.3585  | 888.9120  | 1020.6899 |
| 1103.9433 | 1174.7295 | 1187.0825 |
| 1200.9922 | 1261.1622 | 1267.5234 |
| 1273.0628 | 1292.1334 | 1309.6599 |
| 1359.4709 | 1385.3070 | 1411.7186 |
| 1448.7103 | 1607.3223 | 3809.4870 |

Zero-point correction (Hartree): 0.082018

TS.C3F7OCFOHCF2.C3F7OCOCF2+HF

E(UM062X/Aug-CC-pVTZ) (Hartree): -1340.00972409

Electronic state : 2-A

Cartesian coordinates (Angs):

|   |           |           |           |
|---|-----------|-----------|-----------|
| C | 2.809359  | -0.688208 | -0.117809 |
| C | 2.126711  | 0.524717  | -0.402664 |
| O | 0.836919  | 0.513911  | -0.767383 |
| F | 2.101461  | 1.324768  | 1.343900  |
| C | -0.139935 | -0.283256 | -0.196003 |
| F | 0.139355  | -0.588191 | 1.062359  |
| F | -0.269120 | -1.414054 | -0.893537 |
| C | -1.454675 | 0.529794  | -0.273560 |
| F | 4.056260  | -0.674837 | 0.193751  |
| F | 2.233538  | -1.832369 | 0.047524  |
| O | 2.808519  | 1.567588  | -0.723608 |
| H | 2.697572  | 1.935756  | 0.301150  |
| C | -2.710129 | -0.219670 | 0.232473  |
| F | -1.666107 | 0.865063  | -1.550785 |
| F | -1.306149 | 1.632524  | 0.460810  |
| F | -3.745802 | 0.603382  | 0.168141  |
| F | -2.546610 | -0.610543 | 1.487821  |
| F | -2.957831 | -1.279967 | -0.523078 |

Rotational constants (GHz): 0.9859500 0.2916700 0.2712800

Vibrational harmonic frequencies (cm-1):

|            |           |           |
|------------|-----------|-----------|
| i1238.4115 | 15.7112   | 31.4677   |
| 69.0783    | 76.7018   | 95.5891   |
| 112.7913   | 140.9724  | 173.8124  |
| 200.0861   | 225.7581  | 236.7746  |
| 241.5676   | 265.8444  | 300.0864  |
| 339.9625   | 356.8568  | 370.6835  |
| 386.2781   | 410.4618  | 468.8950  |
| 505.1916   | 511.5435  | 539.8753  |
| 554.6021   | 597.9026  | 609.2538  |
| 637.8791   | 686.2907  | 762.7556  |
| 768.0253   | 828.4608  | 857.4878  |
| 928.3866   | 1038.1860 | 1182.1437 |
| 1190.3773  | 1234.6277 | 1263.9989 |
| 1276.6089  | 1291.9056 | 1306.3714 |
| 1380.8527  | 1415.9428 | 1463.0417 |



1473.9708                    1666.5093                    2306.0158  
Zero-point correction (Hartree): 0.074718

TS.C3F7OCFCF2OH.C3F7OCFCFO+HF

E(UM062X/Aug-CC-pVTZ) (Hartree): -1340.01553943

Electronic state : 2-A

Cartesian coordinates (Angs):

|   |           |           |           |
|---|-----------|-----------|-----------|
| C | 2.959723  | -0.195754 | -0.412945 |
| C | 1.990515  | 0.836967  | -0.215240 |
| O | 0.733469  | 0.776792  | -0.646277 |
| F | 2.284861  | 1.818291  | 0.580496  |
| C | -0.188171 | 0.052953  | 0.112244  |
| F | -0.074918 | 0.370640  | 1.396160  |
| F | 0.021848  | -1.249021 | -0.024402 |
| C | -1.584474 | 0.437693  | -0.425452 |
| F | 2.616335  | -1.070935 | -1.314813 |
| O | 4.181091  | -0.079542 | -0.072978 |
| F | 2.757010  | -1.151923 | 1.188905  |
| H | 3.929438  | -0.676190 | 0.839105  |
| C | -2.754399 | -0.357047 | 0.201451  |
| F | -1.782233 | 1.735702  | -0.176773 |
| F | -1.604132 | 0.228820  | -1.745119 |
| F | -2.735798 | -0.243280 | 1.521567  |
| F | -2.676630 | -1.636705 | -0.127300 |
| F | -3.893574 | 0.137225  | -0.259323 |

Rotational constants (GHz): 1.0196200    0.2736100    0.2656100

Vibrational harmonic frequencies (cm-1):

|            |           |           |
|------------|-----------|-----------|
| i1375.4290 | 19.0883   | 32.4315   |
| 50.2409    | 65.9395   | 88.3205   |
| 109.1690   | 112.0125  | 168.2731  |
| 195.1259   | 225.5397  | 233.6822  |
| 241.0178   | 291.5270  | 299.2066  |
| 332.0799   | 341.8488  | 384.5216  |
| 390.3586   | 449.9761  | 477.0138  |
| 526.1249   | 540.5195  | 553.9528  |
| 569.0852   | 584.4742  | 613.6735  |
| 648.5554   | 680.9224  | 759.4648  |
| 790.0543   | 821.8169  | 840.2846  |
| 921.5552   | 1013.5858 | 1161.8667 |
| 1199.5555  | 1234.2375 | 1262.7125 |
| 1271.7483  | 1289.8233 | 1310.4316 |
| 1384.6133  | 1398.2973 | 1437.9893 |
| 1491.9100  | 1646.9005 | 2220.1605 |

Zero-point correction (Hartree): 0.074454

TS.C3F7OCFOCFO.C3F7OCFO+CFO

E(UM062X/Aug-CC-pVTZ) (Hartree): -1314.82113750

Electronic state : 2-A

Cartesian coordinates (Angs):

|   |           |           |           |
|---|-----------|-----------|-----------|
| C | 3.098674  | 0.823256  | 0.170030  |
| C | 2.137832  | -0.759631 | -0.113661 |
| O | 0.917141  | -0.466830 | 0.482437  |
| F | 2.774503  | -1.565947 | 0.731661  |
| C | -0.170532 | -0.282009 | -0.334583 |
| F | -0.392307 | -1.357309 | -1.090401 |
| F | -0.018803 | 0.771183  | -1.139050 |
| C | -1.375136 | -0.044254 | 0.607650  |
| F | 2.446683  | 1.806533  | -0.371185 |
| O | 4.128784  | 0.825001  | 0.700836  |
| O | 2.313149  | -0.822642 | -1.322386 |
| C | -2.721502 | 0.219153  | -0.107351 |
| F | -1.105930 | 1.019184  | 1.374079  |
| F | -1.527179 | -1.122730 | 1.381772  |
| F | -3.046087 | -0.802825 | -0.885178 |
| F | -2.656815 | 1.320605  | -0.840348 |
| F | -3.661688 | 0.373158  | 0.814249  |

Rotational constants (GHz): 0.9959500    0.2858400    0.2750400

Vibrational harmonic frequencies (cm-1):

|           |           |           |
|-----------|-----------|-----------|
| i372.4881 | 14.8615   | 38.4612   |
| 43.7194   | 59.8698   | 90.0011   |
| 96.5323   | 151.5365  | 197.7253  |
| 206.6273  | 225.9445  | 228.6765  |
| 241.0017  | 297.5274  | 299.8227  |
| 341.4360  | 349.1968  | 385.0725  |
| 412.4747  | 417.9495  | 489.2743  |
| 542.1014  | 573.4949  | 578.4149  |
| 609.9337  | 629.7231  | 645.9607  |
| 694.0616  | 697.6834  | 769.2518  |
| 856.7606  | 889.9092  | 1055.9160 |
| 1135.3232 | 1192.9684 | 1194.6234 |
| 1231.0489 | 1243.7003 | 1268.0010 |
| 1295.9196 | 1304.3999 | 1382.2067 |
| 1409.5129 | 1576.7605 | 2023.7183 |

Zero-point correction (Hartree): 0.066953

TS.C3F7OCFOHCF2.C3F7OCHOHF3

E(UM062X/Aug-CC-pVTZ) (Hartree): -1340.01245377  
 Electronic state : 2-A  
 Cartesian coordinates (Angs):

|   |           |           |           |
|---|-----------|-----------|-----------|
| C | 2.706335  | -0.583059 | -0.276254 |
| C | 2.078660  | 0.644065  | -0.217762 |
| O | 0.779755  | 0.861048  | 0.012250  |
| C | -0.184396 | -0.118552 | -0.012433 |
| F | -0.123016 | -0.890599 | 1.066889  |
| F | -0.054869 | -0.887555 | -1.097641 |
| C | -1.543124 | 0.621851  | -0.055344 |
| F | 3.928227  | -0.675477 | -0.683089 |
| F | 2.181764  | -1.709063 | 0.061337  |
| O | 2.726812  | 1.742995  | -0.534422 |
| H | 3.477021  | 1.806986  | 0.082631  |
| F | 3.039106  | 0.382683  | 1.541250  |
| C | -2.781857 | -0.301765 | 0.030965  |
| F | -1.610430 | 1.297759  | -1.206934 |
| F | -1.597285 | 1.476683  | 0.968003  |
| F | -3.869224 | 0.437956  | -0.126087 |
| F | -2.744213 | -1.221122 | -0.924122 |
| F | -2.837090 | -0.901771 | 1.209252  |

Rotational constants (GHz): 1.0296500 0.2755000 0.2610000  
 Vibrational harmonic frequencies (cm-1):

|           |           |           |
|-----------|-----------|-----------|
| i325.0359 | 15.6889   | 25.8759   |
| 65.5239   | 76.3166   | 88.0583   |
| 150.1953  | 173.0345  | 183.4848  |
| 198.5391  | 229.4652  | 245.4089  |
| 257.7090  | 271.3674  | 299.6031  |
| 327.1062  | 340.3856  | 360.3420  |
| 371.6996  | 387.3961  | 444.0301  |
| 475.5126  | 511.2056  | 536.1123  |
| 550.3110  | 580.4574  | 596.6829  |
| 603.3757  | 630.0431  | 689.6350  |
| 766.8893  | 795.9531  | 869.8592  |
| 1035.3135 | 1174.5375 | 1206.8575 |
| 1215.7351 | 1244.8566 | 1273.3357 |
| 1275.1991 | 1295.1237 | 1305.1799 |
| 1382.7099 | 1413.8970 | 1454.0658 |
| 1473.8768 | 1738.0610 | 3705.0066 |

Zero-point correction (Hartree): 0.078166

TS.C3F7OCFCF2OH.C3F7OCFHCF2O

E(UM062X/Aug-CC-pVTZ) (Hartree): -1340.00916577  
 Electronic state : 2-A  
 Cartesian coordinates (Angs):

|   |           |           |           |
|---|-----------|-----------|-----------|
| C | -3.176753 | -0.396867 | 0.082420  |
| C | -1.984025 | 0.516840  | -0.070141 |
| O | -0.812701 | -0.094648 | -0.400242 |
| F | -4.275590 | 0.012801  | -0.553354 |
| F | -2.193021 | 1.663908  | -0.701260 |
| F | -2.977975 | -1.676128 | -0.233773 |
| O | -3.221638 | -0.178512 | 1.435466  |
| H | -2.190193 | 0.616038  | 1.231147  |
| C | 0.332392  | 0.374345  | 0.196686  |
| F | 0.276110  | 0.190959  | 1.518985  |
| F | 0.495073  | 1.680033  | -0.022206 |
| C | 1.509792  | -0.424837 | -0.405787 |
| C | 2.905503  | -0.029758 | 0.132271  |
| F | 1.511394  | -0.234813 | -1.728653 |
| F | 1.316659  | -1.719436 | -0.139968 |
| F | 2.965335  | -0.201991 | 1.444621  |
| F | 3.174708  | 1.235600  | -0.152820 |
| F | 3.812135  | -0.803055 | -0.445532 |

Rotational constants (GHz): 1.0744300 0.2521000 0.2437500  
 Vibrational harmonic frequencies (cm-1):

|            |           |           |
|------------|-----------|-----------|
| i1993.7624 | 10.6755   | 20.3456   |
| 48.8214    | 59.9571   | 86.3784   |
| 102.1118   | 160.3548  | 217.9406  |
| 220.3296   | 228.6636  | 233.7382  |
| 281.2469   | 297.1319  | 339.8526  |
| 341.0310   | 376.9179  | 392.0677  |
| 407.3365   | 489.1059  | 525.6977  |
| 544.1300   | 548.6933  | 582.8707  |
| 587.4075   | 630.6307  | 673.0616  |
| 690.9996   | 732.8352  | 766.7387  |
| 826.0681   | 899.1862  | 1025.6790 |
| 1088.2560  | 1163.3352 | 1187.5083 |
| 1198.3787  | 1205.2644 | 1231.5855 |
| 1263.4173  | 1272.7281 | 1283.5069 |
| 1301.8005  | 1306.9296 | 1389.9999 |
| 1419.8398  | 1460.3115 | 2016.7102 |

Zero-point correction (Hartree): 0.075493

TS.C3F7OCFOCF2O.C3F7OCOCFO+F

E(UM062X/Aug-CC-pVTZ) (Hartree): -1314.78277426  
 Electronic state : 2-A  
 Cartesian coordinates (Angs):

|                                                           |           |           |           |
|-----------------------------------------------------------|-----------|-----------|-----------|
| C                                                         | 3.387744  | 0.463106  | -0.252043 |
| C                                                         | 2.029872  | -0.602956 | 0.001244  |
| O                                                         | 0.916277  | 0.155060  | 0.000150  |
| F                                                         | 2.859266  | 0.040480  | 1.369918  |
| C                                                         | -0.294754 | -0.523098 | -0.065025 |
| F                                                         | -0.393565 | -1.405026 | 0.921842  |
| F                                                         | -0.417735 | -1.160616 | -1.224383 |
| C                                                         | -1.390340 | 0.561558  | 0.068480  |
| F                                                         | 2.950195  | 1.688723  | -0.308266 |
| O                                                         | 4.415864  | 0.039124  | -0.601084 |
| O                                                         | 2.164046  | -1.754034 | -0.185760 |
| C                                                         | -2.839069 | 0.029437  | -0.044884 |
| F                                                         | -1.207579 | 1.465848  | -0.898409 |
| F                                                         | -1.255973 | 1.147544  | 1.260537  |
| F                                                         | -3.068755 | -0.893222 | 0.877505  |
| F                                                         | -3.051958 | -0.490861 | -1.243909 |
| F                                                         | -3.672809 | 1.041631  | 0.139267  |
| Rotational constants (GHz): 1.0837400 0.2682300 0.2537000 |           |           |           |
| Vibrational harmonic frequencies (cm-1):                  |           |           |           |
| i443.3035                                                 | 13.6951   | 31.3617   |           |
| 48.0745                                                   | 70.2712   | 87.5241   |           |
| 144.8231                                                  | 157.7952  | 202.9404  |           |
| 215.4778                                                  | 227.9604  | 237.3243  |           |
| 275.5637                                                  | 295.9086  | 329.9331  |           |
| 343.1692                                                  | 365.8582  | 386.7149  |           |
| 395.3756                                                  | 424.2560  | 465.9938  |           |
| 538.9460                                                  | 551.1464  | 561.5147  |           |
| 591.7474                                                  | 626.8740  | 675.8749  |           |
| 680.0031                                                  | 692.0336  | 708.3967  |           |
| 783.2693                                                  | 879.1773  | 1002.4309 |           |
| 1093.6596                                                 | 1146.8665 | 1186.6463 |           |
| 1207.3072                                                 | 1258.5966 | 1274.0034 |           |
| 1293.2112                                                 | 1308.9652 | 1382.2637 |           |
| 1411.1595                                                 | 1851.2518 | 1946.8708 |           |
| Zero-point correction (Hartree): 0.066915                 |           |           |           |

TS.C3F7OCOHCF3.C3F7OCOCF2+HF

E(UM062X/Aug-CC-pVTZ) (Hartree): -1340.02417702

Electronic state : 2-A

Cartesian coordinates (Angs):

|                                                           |           |           |           |
|-----------------------------------------------------------|-----------|-----------|-----------|
| C                                                         | -2.701457 | -0.510405 | 0.122295  |
| C                                                         | -1.955538 | 0.700037  | 0.109012  |
| O                                                         | -0.714183 | 0.814152  | -0.415226 |
| C                                                         | 0.256582  | -0.130943 | -0.173915 |
| F                                                         | 0.326287  | -0.991581 | -1.188633 |
| F                                                         | -0.000720 | -0.820806 | 0.941273  |
| C                                                         | 1.600770  | 0.621336  | -0.031678 |
| F                                                         | -3.376050 | -0.868766 | 1.165274  |
| F                                                         | -2.337371 | -1.515973 | -0.597119 |
| O                                                         | -2.636133 | 1.765014  | 0.275293  |
| H                                                         | -3.608528 | 1.352558  | -0.112641 |
| F                                                         | -4.201830 | 0.348957  | -0.637233 |
| C                                                         | 2.845226  | -0.288663 | 0.097103  |
| F                                                         | 1.528324  | 1.383524  | 1.064218  |
| F                                                         | 1.768103  | 1.397106  | -1.105457 |
| F                                                         | 3.903623  | 0.472750  | 0.328023  |
| F                                                         | 2.695947  | -1.137966 | 1.104752  |
| F                                                         | 3.042305  | -0.971029 | -1.020077 |
| Rotational constants (GHz): 1.0810600 0.2607800 0.2467100 |           |           |           |
| Vibrational harmonic frequencies (cm-1):                  |           |           |           |
| i1015.9835                                                | 19.4256   | 31.7943   |           |
| 44.2086                                                   | 65.4260   | 87.2923   |           |
| 148.1026                                                  | 151.0487  | 203.1822  |           |
| 220.8761                                                  | 229.1427  | 241.1544  |           |
| 265.5756                                                  | 299.0525  | 329.7325  |           |
| 344.5752                                                  | 360.4435  | 381.5658  |           |
| 393.6150                                                  | 460.0547  | 504.1156  |           |
| 529.8944                                                  | 549.4091  | 580.3667  |           |
| 590.6983                                                  | 597.5838  | 630.6786  |           |
| 684.4394                                                  | 694.9698  | 763.7945  |           |
| 794.8649                                                  | 860.0420  | 896.6751  |           |
| 1037.1365                                                 | 1171.1127 | 1191.2736 |           |
| 1203.3319                                                 | 1239.6886 | 1251.9082 |           |
| 1273.0972                                                 | 1294.8023 | 1303.7357 |           |
| 1379.9582                                                 | 1412.5354 | 1425.7480 |           |
| 1522.4945                                                 | 1693.7510 | 2021.2397 |           |
| Zero-point correction (Hartree): 0.076035                 |           |           |           |

TS.C3F7OCFCFO.CFOCFO+C3F7

E(UM062X/Aug-CC-pVTZ) (Hartree): -1239.57913566

Electronic state : 2-A

Cartesian coordinates (Angs):

|   |           |           |           |
|---|-----------|-----------|-----------|
| C | -3.076285 | -0.749283 | -0.107823 |
| C | -2.412243 | 0.496895  | 0.377566  |
| O | -1.374628 | 0.551557  | 1.009900  |
| F | -3.036996 | 1.592598  | -0.009083 |
| C | 0.206334  | 0.760019  | -0.131218 |

|                                          |           |           |           |           |
|------------------------------------------|-----------|-----------|-----------|-----------|
| F                                        | 0.528867  | 2.017841  | -0.048991 |           |
| F                                        | -0.292865 | 0.444052  | -1.298375 |           |
| C                                        | 1.203514  | -0.220527 | 0.448935  |           |
| F                                        | -2.338665 | -1.810852 | 0.197725  |           |
| O                                        | -4.107045 | -0.816099 | -0.672805 |           |
| C                                        | 2.574315  | -0.231088 | -0.269160 |           |
| F                                        | 0.687534  | -1.449886 | 0.363103  |           |
| F                                        | 1.414200  | 0.101201  | 1.729289  |           |
| F                                        | 3.144154  | 0.962866  | -0.173558 |           |
| F                                        | 2.402742  | -0.524441 | -1.552884 |           |
| F                                        | 3.366538  | -1.135574 | 0.280933  |           |
| Rotational constants (GHz):              | 1.0499300 | 0.3167600 | 0.2906100 |           |
| Vibrational harmonic frequencies (cm-1): |           |           |           |           |
| i527.8243                                |           | 20.6060   |           | 27.1724   |
| 40.9214                                  |           | 53.4789   |           | 66.6951   |
| 85.3671                                  |           | 124.9172  |           | 152.4080  |
| 195.5050                                 |           | 208.6155  |           | 230.5272  |
| 272.9029                                 |           | 285.2634  |           | 346.4716  |
| 376.4822                                 |           | 382.5158  |           | 425.3542  |
| 438.5181                                 |           | 515.4084  |           | 522.2974  |
| 545.8050                                 |           | 572.9320  |           | 617.8116  |
| 656.4255                                 |           | 677.1947  |           | 689.8995  |
| 775.8235                                 |           | 796.4217  |           | 846.9252  |
| 1038.3959                                |           | 1170.9425 |           | 1206.2555 |
| 1266.8564                                |           | 1273.0399 |           | 1282.4883 |
| 1292.7924                                |           | 1370.2354 |           | 1380.1064 |
| 1424.0744                                |           | 1593.4342 |           | 1931.5974 |
| Zero-point correction (Hartree):         | 0.061923  |           |           |           |

TS.C3F7OCFOCFO.FCOCFO+C3F7O

E(UM062X/Aug-CC-pVTZ) (Hartree): -1314.79528957

Electronic state : 2-A

Cartesian coordinates (Angs):

|   |           |           |           |
|---|-----------|-----------|-----------|
| C | 2.779660  | 0.856354  | -0.260803 |
| C | 2.566195  | -0.635453 | 0.052244  |
| O | 0.851053  | -0.665574 | 0.653371  |
| F | 3.152169  | -0.960029 | 1.189879  |
| C | -0.139293 | -0.449154 | -0.239342 |
| F | -0.485506 | -1.547037 | -0.910234 |
| F | 0.192430  | 0.493433  | -1.134244 |
| C | -1.360658 | 0.055673  | 0.601748  |
| F | 2.544337  | 1.599557  | 0.806151  |
| O | 3.132016  | 1.274150  | -1.295113 |
| O | 2.352467  | -1.466844 | -0.814223 |
| C | -2.671957 | 0.190438  | -0.214617 |
| F | -1.051926 | 1.255328  | 1.099014  |
| F | -1.588333 | -0.798346 | 1.601244  |
| F | -3.119971 | -0.999696 | -0.577822 |
| F | -2.477274 | 0.933633  | -1.293366 |
| F | -3.580145 | 0.774156  | 0.554085  |

Rotational constants (GHz): 0.9448000 0.2949600 0.2876600

|                                          |          |           |  |           |
|------------------------------------------|----------|-----------|--|-----------|
| Vibrational harmonic frequencies (cm-1): |          |           |  |           |
| i613.7454                                |          | 18.1683   |  | 31.7017   |
| 36.6959                                  |          | 67.1362   |  | 80.7522   |
| 94.4162                                  |          | 157.6634  |  | 180.0132  |
| 212.5249                                 |          | 228.2004  |  | 230.5616  |
| 241.9576                                 |          | 267.5471  |  | 293.3036  |
| 337.0115                                 |          | 353.5382  |  | 380.4792  |
| 397.1770                                 |          | 449.3258  |  | 468.9193  |
| 533.7249                                 |          | 547.8424  |  | 571.8080  |
| 586.8153                                 |          | 628.4650  |  | 675.1577  |
| 682.3022                                 |          | 748.2127  |  | 765.1600  |
| 814.9544                                 |          | 830.4069  |  | 993.8103  |
| 1153.0909                                |          | 1158.5502 |  | 1191.5747 |
| 1232.0246                                |          | 1258.7766 |  | 1273.6550 |
| 1303.1480                                |          | 1306.1717 |  | 1320.1010 |
| 1385.3744                                |          | 1571.2045 |  | 1988.1260 |
| Zero-point correction (Hartree):         | 0.066175 |           |  |           |

\*\*\*\*\*  
CF3CF=CF2 + OH : M06-2X/aug-cc-pVTZ geometry  
\*\*\*\*\*

CF3CFCF2

E(RM062X/CC-pVDZ) (Hartree): -713.14454132

Electronic state : 1-A

Cartesian coordinates (Angs):

|   |           |           |           |
|---|-----------|-----------|-----------|
| C | 1.402535  | -0.157078 | -0.000002 |
| C | 0.241372  | 0.488409  | -0.000029 |
| C | -1.119024 | -0.134950 | -0.000001 |
| F | 0.223975  | 1.823237  | -0.000021 |
| F | 2.553768  | 0.463613  | 0.000017  |
| F | 1.543737  | -1.455671 | -0.000006 |
| F | -1.046686 | -1.464353 | -0.000102 |
| F | -1.812307 | 0.251056  | 1.074853  |
| F | -1.812409 | 0.251196  | -1.074720 |

Rotational constants (GHz): 2.5537100 1.2667000 0.9927100

Vibrational harmonic frequencies (cm-1):

|           |           |           |
|-----------|-----------|-----------|
| 37.6737   | 129.4577  | 175.5998  |
| 247.7172  | 248.0135  | 367.1500  |
| 373.9281  | 474.5601  | 518.7231  |
| 586.9552  | 612.2294  | 669.6819  |
| 684.1958  | 790.8516  | 1075.6346 |
| 1260.1232 | 1271.3807 | 1295.6839 |
| 1408.1577 | 1472.8593 | 1912.1661 |

Zero-point correction (Hartree): 0.035568

CF3CFCF2OH

E(UM062X/CC-pVDZ) (Hartree): -788.93888163

Electronic state : 2-A

Cartesian coordinates (Angs):

|   |           |           |           |
|---|-----------|-----------|-----------|
| C | -1.303451 | -0.125659 | -0.031349 |
| C | -0.012458 | 0.591152  | -0.341223 |
| C | 1.286070  | -0.107464 | -0.053253 |
| F | -0.017123 | 1.886270  | -0.079736 |
| F | -2.313601 | 0.450548  | -0.687155 |
| F | -1.164890 | -1.396558 | -0.483118 |
| F | 1.227696  | -0.716933 | 1.160464  |
| F | 1.545173  | -1.055425 | -0.945956 |
| F | 2.293452  | 0.753572  | -0.023522 |
| O | -1.631398 | -0.113679 | 1.288385  |
| H | -0.906144 | -0.532003 | 1.779079  |

Rotational constants (GHz): 2.0845200 1.0701800 0.9353500

Vibrational harmonic frequencies (cm-1):

|           |           |           |
|-----------|-----------|-----------|
| 48.3876   | 68.2928   | 150.0408  |
| 172.5356  | 253.2285  | 295.2930  |
| 326.2258  | 347.4436  | 364.4615  |
| 460.5885  | 514.9848  | 540.8673  |
| 554.7354  | 619.6182  | 691.2520  |
| 710.6764  | 801.7906  | 1006.1738 |
| 1160.7549 | 1173.7163 | 1224.9472 |
| 1264.1820 | 1315.2839 | 1390.6640 |
| 1434.8583 | 1480.1216 | 3820.5567 |

Zero-point correction (Hartree): 0.050556

CF3CFOHCF2

E(UM062X/CC-pVDZ) (Hartree): -788.92967318

Electronic state : 2-A

Cartesian coordinates (Angs):

|   |           |           |           |
|---|-----------|-----------|-----------|
| C | 1.492087  | 0.117492  | -0.010636 |
| C | 0.093616  | 0.696578  | -0.072352 |
| C | -0.996979 | -0.381197 | 0.052457  |
| F | -0.042576 | 1.250952  | -1.315383 |
| F | 1.828803  | -0.668544 | -1.012126 |
| F | 1.818916  | -0.409933 | 1.155231  |
| F | -0.879622 | -1.016590 | 1.216775  |
| F | -2.205770 | 0.161420  | -0.022284 |
| F | -0.865974 | -1.271564 | -0.930083 |
| O | -0.129021 | 1.596847  | 0.924706  |
| H | 0.615840  | 2.216318  | 0.956367  |

Rotational constants (GHz): 1.7887100 1.1952500 1.1640100

Vibrational harmonic frequencies (cm-1):

|           |           |           |
|-----------|-----------|-----------|
| 29.8252   | 88.1596   | 147.0810  |
| 211.2630  | 228.0769  | 278.2800  |
| 323.2286  | 348.1811  | 379.4977  |
| 400.5734  | 514.3736  | 524.6588  |
| 557.5784  | 613.5478  | 642.0341  |
| 700.0667  | 792.8711  | 1007.5044 |
| 1164.5180 | 1264.7544 | 1279.1357 |
| 1298.8124 | 1306.6746 | 1359.8392 |
| 1430.6224 | 1453.2474 | 3814.6291 |

Zero-point correction (Hartree): 0.050482
